# Supplementary material for: Psychiatric Adverse Reactions to Anaplastic Lymphoma Kinase Inhibitors in Non-Small-Cell Lung Cancer: Analysis of Spontaneous Reports Submitted to the FDA Adverse Event Reporting System
Source: Springer Nature journal article supplement (doi:10.1007/s11523-021-00865-8), 2022-01-01
Supplement: MOESM1 [file 11523_2021_865_MOESM1_ESM.pdf]

## **Psychiatric Adverse Reactions to Anaplastic Lymphoma Kinase Inhibitors in Non-Small-Cell Lung Cancer: analysis of spontaneous reports submitted to the FDA Adverse Event Reporting System**

Monia Sisi <sup>a\*#</sup>, Michele Fusaroli <sup>b#</sup>, Andrea De Giglio <sup>a,c</sup>, Francesco Facchinetti <sup>d</sup>, Andrea Ardizzoni <sup>a,c</sup>, Emanuel Raschi <sup>b§</sup>, Francesco Gelsomino <sup>a,c§</sup>

<sup>a</sup> Department of Experimental, Diagnostic and Specialty Medicine, Policlinico S. Orsola-Malpighi, Alma Mater Studiorum - University of Bologna, Bologna, Italy

<sup>b</sup> Pharmacology Unit, Department of Medical and Surgical Sciences, Alma Mater Studiorum, University of Bologna, Bologna, Italy

<sup>c</sup> Divisione di Oncologia medica, IRCCS Azienda Ospedaliero-Universitaria di Bologna, Bologna, Italy

<sup>d</sup> Université Paris-Saclay, Institut Gustave Roussy, Inserm, Biomarqueurs prédictifs et nouvelles stratégies thérapeutiques en oncologie, Villejuif, France.

# These authors contributed equally. § These authors contributed equally.

### **\* Corresponding author:**

Monia Sisi

Department of Experimental, Diagnostic and Specialty Medicine, Policlinico S. Orsola-Malpighi, Alma Mater Studiorum - University of Bologna, Bologna, Italy

Email: [monia.sisi@studio.unibo.it](mailto:monia.sisi@studio.unibo.it)

## SUPPLEMENTARY MATERIAL

### CAUSALITY ASSESSMENT SCORE

Our score is an adaptation of the WHO criteria for causality assessment of spontaneous reports of adverse events, namely, to assess the drug-related component.

We consider time to onset, major and minor alternative causes (separately concomitant drugs and comorbidities), dechallenge, rechallenge, and the role of the drug in adverse event occurrence, as expressed by the reporter (i.e., if the drug was reported as suspect or concomitant). The numerical score obtained was converted to a categorical judgment of probability.

### SCORE

---

**Suspect (S)**

0 if the drug is reported as concomitant by the reporter

1 if the drug is suspected as a main cause for the event by the reporter

---

**Dechallenge (D)**

0 no information

1 if the event improves/regresses when the drug is withdrawn

---

**Rechallenge (R)**

0 no information

1 if the same/similar adverse event reappears when reintroducing the drug

---

|                                    |                                                                                                                                                                                                                                 |                                                                                                                                                                                                                                                                                                                                                                                                                                                                                                                       |
|------------------------------------|---------------------------------------------------------------------------------------------------------------------------------------------------------------------------------------------------------------------------------|-----------------------------------------------------------------------------------------------------------------------------------------------------------------------------------------------------------------------------------------------------------------------------------------------------------------------------------------------------------------------------------------------------------------------------------------------------------------------------------------------------------------------|
| <b>Concomitant medications (I)</b> | <p>0 no concomitant drugs recorded</p> <p>-2 if concomitant with a drug known to cause the event</p> <p>-1 if concomitant with a drug possibly contributing to the event</p>                                                    | <p>-2: (hydroxychloroquine, betamethasone, dexamethasone, fluocortolone, methylprednisolone, paramethasone, prednisolone, prednisone, triamcinolone, hydrocortisone, cortisone, prednylidene, rimexolone, deflazacort, cloprednol, meprednisone, cortivazol, aldosterone, fludrocortisone, desoxycortone)</p> <p>-1: (none)</p>                                                                                                                                                                                       |
| <b>Comorbidities (P)</b>           | <p>0 no comorbidities recorded</p> <p>-2 if comorbidity sufficient to cause the event, reported either as reaction or indication</p> <p>-1 comorbidity contributing to the event, reported either as reaction or indication</p> | <p>-2: (metastases to central nervous system, metastases to meninges, brain neoplasm malignant, brain stem stroke, brain oedema, cerebrovascular accident, brain neoplasm, lumbar spinal stenosis, metastases to spine, spinal cord compression, haemorrhage intracranial, meningioma malignant, basilar artery thrombosis, cerebral artery thrombosis, subarachnoid haemorrhage, leukoencephalopathy, brain abscess, intracranial aneurysm, cerebral haemorrhage, herpes simplex encephalitis)</p> <p>-1: (none)</p> |
| <b>Time to onset (latency)</b>     | <p>0 if time to onset plausible</p> <p>-1 if time to onset not plausible (i.e., the event occurred before the drug was started)</p>                                                                                             | <p>Please note that, apart from excluding negative time to onset, we did not consider any strict interval to identify a plausible latency.</p>                                                                                                                                                                                                                                                                                                                                                                        |

| STAGING                | COMBINATIONS FOUND                                                                                                                                                                                                    |
|------------------------|-----------------------------------------------------------------------------------------------------------------------------------------------------------------------------------------------------------------------|
| <b>Highly Probable</b> | 2/3: S <sub>1</sub> D <sub>1</sub> R <sub>1</sub> ; S <sub>1</sub> D <sub>1</sub> ; S <sub>1</sub> R <sub>1</sub> ; D <sub>1</sub> R <sub>1</sub>                                                                     |
| <b>Probable</b>        | 1: S <sub>1</sub> ; D <sub>1</sub> ; R <sub>1</sub> ; S <sub>1</sub> D <sub>1</sub> R <sub>1</sub> I <sub>-2</sub> ; S <sub>1</sub> D <sub>1</sub> R <sub>1</sub> P <sub>-2</sub>                                     |
| <b>Possible</b>        | 0/-1: S <sub>1</sub> D <sub>1</sub> I <sub>-2</sub> ; S <sub>1</sub> I <sub>-2</sub> ; S <sub>1</sub> P <sub>-2</sub> ; S <sub>1</sub> R <sub>1</sub> I <sub>-2</sub> ; S <sub>1</sub> D <sub>1</sub> P <sub>-2</sub> |
| <b>Unlikely</b>        | -2/-3/-4/-5: S <sub>1</sub> I <sub>-2</sub> P <sub>-2</sub> ; S <sub>1</sub> D <sub>1</sub> I <sub>-2</sub> P <sub>-2</sub>                                                                                           |

**ALK TKI RELATED PSYCHIATRIC ADVERSE EVENTS: case listing**

ALECTINIB

| Case | Psychiatric Event                        | age | sex | weight | country | time to onset | Stopped* | other drug-related risk factors | other disease-related risk factors   | Outcome# | causality score |
|------|------------------------------------------|-----|-----|--------|---------|---------------|----------|---------------------------------|--------------------------------------|----------|-----------------|
| 1    | Depression                               |     | F   |        | US      |               | N        |                                 |                                      |          | probable        |
| 2    | Depression                               | 57  | M   |        | US      |               | Y        |                                 |                                      | HO       | probable        |
| 3    | Depression                               | 57  | M   |        | US      |               | Y        |                                 |                                      | HO       | probable        |
| 4    | Emotional disorder                       | 43  | F   | 58     | US      | 1             | N        |                                 |                                      |          | probable        |
| 5    | Depression                               | 49  | F   | 60     | GB      |               | N        | dexamethasone                   | metastases to central nervous system | HO       | unlikely        |
| 6    | Depression                               |     | M   |        | US      |               | N        |                                 |                                      | HO       | probable        |
| 7    | Feeling abnormal<br>Thinking abnormal    |     | F   |        | US      |               | N        |                                 |                                      |          | probable        |
| 8    | Emotional disorder<br>Emotional distress |     | F   |        | US      |               | N        |                                 |                                      |          | probable        |
| 9    | Bradyphrenia                             | 47  | F   |        | GR      |               | N        |                                 |                                      | OT       | probable        |
| 10   | Depression                               |     | F   |        | US      |               | N        |                                 |                                      |          | probable        |
| 11   | Irritability                             |     | F   |        | US      |               | N        |                                 |                                      |          | probable        |
| 12   | Anxiety                                  | 60  | F   |        | US      |               | N        |                                 |                                      | HO       | probable        |
| 13   | Suicide attempt<br>Completed suicide     | 68  | M   |        | FR      | 379           | N        |                                 |                                      | DE       | probable        |

|    |                                                       |    |   |     |    |    |       |               |  |    |                    |
|----|-------------------------------------------------------|----|---|-----|----|----|-------|---------------|--|----|--------------------|
| 14 | Psychotic disorder                                    | 32 | M | 110 | DE | 8  | N     |               |  | HO | probable           |
| 15 | Acute psychosis<br>Hypomania                          | 36 | F | 61  | IE | 25 | Y (D) | dexamethasone |  | HO | possible           |
| 16 | Mania                                                 | 48 | F |     | IT | 70 | N     |               |  | HO | probable           |
| 17 | Abnormal behaviour<br>Affective disorder<br>Hypomania | 52 | F | 62  | MY |    | Y     |               |  | HO | highly<br>probable |
| 18 | Mania                                                 | 46 | F |     | IT |    | N     |               |  | HO | probable           |

BRIGATINIB

| Case | Psychiatric Event                                                | age | sex | weight | country | time to onset | Stopped* | other drug-related risk factors | other disease-related risk factors   | Outcome# | causality score |
|------|------------------------------------------------------------------|-----|-----|--------|---------|---------------|----------|---------------------------------|--------------------------------------|----------|-----------------|
| 1    | Psychotic disorder                                               |     | M   | 175    | US      |               | N        |                                 |                                      | HO       | possible        |
| 2    | Depressed mood<br>Depression<br>Discomfort<br>Emotional distress | 62  | F   |        | US      |               | N        |                                 | brain neoplasm malignant             | OT       | probable        |
| 3    | Depressed mood<br>Depression<br>Discomfort<br>Emotional distress |     |     |        | US      |               | N        |                                 | metastases to central nervous system | OT       | possible        |
| 4    | Emotional distress                                               |     | F   | 58     | US      |               | N        |                                 | metastases to central nervous system | OT       | possible        |
| 5    | Mania                                                            | 54  | F   |        | CA      |               | N        | dexamethasone                   |                                      | HO       | possible        |

|    |                                                    |    |   |    |    |  |   |               |  |    |          |
|----|----------------------------------------------------|----|---|----|----|--|---|---------------|--|----|----------|
| 6  | Depressed mood<br>Depression<br>Emotional distress |    | F | 54 | US |  | N |               |  | OT | probable |
| 7  | Fear<br>Feeling abnormal                           |    | F |    | US |  | N |               |  |    | probable |
| 8  | Anxiety                                            |    | M |    | US |  | N |               |  | OT | probable |
| 9  | Anxiety                                            |    | F |    | US |  | N |               |  | HO | probable |
| 10 | Agitation<br>Hypersomnia                           | 77 | F |    | US |  | N | dexamethasone |  |    | possible |

CERITINIB

| Case | Psychiatric Event                                          | age | sex | weight | country | time to onset | Stopped* | other drug-related risk factors | other disease-related risk factors | Outcome# | causality score |
|------|------------------------------------------------------------|-----|-----|--------|---------|---------------|----------|---------------------------------|------------------------------------|----------|-----------------|
| 1    | Depression                                                 | 60  | F   |        | US      | 1076          | N        |                                 |                                    |          | probable        |
| 2    | Depression                                                 | 74  | F   |        | US      |               | N        |                                 |                                    |          | probable        |
| 3    | Emotional disorder<br>Feeding disorder<br>Feeling abnormal | 20  | F   | 48     | IL      |               | N        |                                 |                                    | HO       | probable        |
| 4    | Depression                                                 |     | F   |        | US      |               | N        |                                 |                                    | OT       | probable        |
| 5    | Anxiety                                                    | 41  | F   |        | US      |               | N        |                                 |                                    | HO       | probable        |
| 6    | Mood altered                                               |     | F   | 67     | US      |               | N        |                                 |                                    | OT       | probable        |
| 7    | Depression                                                 |     | F   |        | IN      |               | N        |                                 |                                    | OT       | probable        |
| 8    | Psychotic disorder                                         |     | M   |        | SE      |               | N        |                                 |                                    | OT       | probable        |
| 9    | Anxiety                                                    |     | M   |        | BE      |               | Y        |                                 |                                    | DE       | probable        |
| 10   | Major depression                                           | 54  | F   |        | BE      |               | N        |                                 |                                    | DE       | probable        |
| 11   | Depressed mood<br>Feeling abnormal                         | 60  | M   |        | IL      |               | Y (D)    |                                 |                                    | OT       | highly probable |
| 12   | Disturbance in attention                                   | 87  | M   |        | TH      |               | N        |                                 |                                    | DE       | probable        |

## CRIZOTINIB

| Case | Psychiatric Event                                                  | age | sex | weight | country | time to onset | stopped* | other drug-related risk factor | other disease-related risk factor | Outcome# | causality score |
|------|--------------------------------------------------------------------|-----|-----|--------|---------|---------------|----------|--------------------------------|-----------------------------------|----------|-----------------|
| 1    | Confusional State<br>Feeling Abnormal<br>Speech Disorder           | 76  | F   |        | US      | 15            |          |                                |                                   |          | probable        |
| 2    | Hallucination                                                      | 51  | F   |        | US      |               |          |                                |                                   |          | probable        |
| 3    | Completed Suicide                                                  | 53  | F   | 52     | JP      | 17            | Y        | dexamethasone                  |                                   | DE       | possible        |
| 4    | Suicide Attempt                                                    | 61  | F   | 43     | JP      | 170           | Y        |                                |                                   | LT       | probable        |
| 5    | Depression<br>Euphoric Mood                                        | 60  | F   |        | US      | 7             |          |                                |                                   |          | probable        |
| 6    | Confusional State<br>Depression<br>Fatigue<br>Insomnia<br>Lethargy | 58  | F   |        | US      |               |          |                                |                                   | OT       | probable        |
| 7    | Mania                                                              | 38  | M   | 80     | DE      | 288           |          | dexamethasone                  |                                   | HO       | possible        |
| 8    | Feeling Jittery<br>Irritability<br>Nervousness                     | 69  | F   |        | US      |               |          |                                |                                   |          | probable        |
| 9    | Insomnia<br>Psychotic Disorder                                     | 84  | F   |        | US      |               |          |                                |                                   | OT       | probable        |
| 10   | Abnormal Behaviour<br>Cognitive Disorder                           | 70  | M   | 61     | FR      | 60            | Y        |                                |                                   | HO       | probable        |
| 11   | Anxiety<br>Fatigue                                                 | 67  | M   |        | US      |               |          |                                |                                   |          | probable        |
| 12   | Hallucination, Visual                                              | 56  | M   |        | US      |               |          |                                |                                   |          | probable        |



|    |                                                                                                       |    |   |    |    |     |       |  |    |                    |
|----|-------------------------------------------------------------------------------------------------------|----|---|----|----|-----|-------|--|----|--------------------|
| 13 | Completed Suicide                                                                                     | 48 | F |    | CN |     |       |  | DE | probable           |
| 14 | Depression                                                                                            | 45 | F |    | US |     |       |  |    | probable           |
| 15 | Anxiety                                                                                               | 47 | M |    | US |     | Y     |  |    | probable           |
| 16 | Depression                                                                                            | 54 | F | 62 | SA |     |       |  | OT | probable           |
| 17 | Agitation<br>Delirium<br>Persecutory Delusion<br>Irregular Sleep Wake<br>Rhythm Disorder              | 55 | F |    | FR | 241 |       |  | HO | probable           |
| 18 | Anxiety<br>Suicidal ideation                                                                          | 56 | F | 70 | US | 422 |       |  | OT | probable           |
| 19 | Major Depression                                                                                      | 62 | M | 61 | JP | 264 |       |  | HO | probable           |
| 20 | Psychiatric<br>Decompensation<br>Vomiting<br>Psychogenic                                              | 48 | M |    | CH |     | Y (D) |  | OT | highly<br>probable |
| 21 | Cognitive Disorder<br>Eating Disorder<br>Fatigue<br>Memory Impairment<br>Psychotic Disorder<br>Stress | 59 | F | 46 | US |     |       |  |    | probable           |

|    |                                                                                                                                        |    |   |    |    |    |       |               |  |    |                    |
|----|----------------------------------------------------------------------------------------------------------------------------------------|----|---|----|----|----|-------|---------------|--|----|--------------------|
| 22 | Incoherent<br>Insomnia<br>Intentional Overdose<br>Memory Impairment<br>Poverty of Speech<br>Psychomotor<br>Hyperactivity<br>Somnolence | 37 | F |    | RU |    | Y (D) |               |  | HO | highly<br>probable |
| 23 | Hallucination<br>Restlessness                                                                                                          | 63 | F |    | US | 19 |       |               |  |    | probable           |
| 24 | Abnormal Behaviour<br>Aggression<br>Atered State of<br>Consciousness<br>Insomnia                                                       | 66 | M |    | TR |    |       | dexamethasone |  | DE | possible           |
| 25 | Abnormal Behaviour<br>Language Disorder<br>Personality Change                                                                          | 64 | F |    | US |    |       |               |  | OT | probable           |
| 26 | Depression                                                                                                                             | 76 | M | 72 | US |    |       |               |  |    | probable           |
| 27 | Completed Suicide                                                                                                                      | 50 | F |    | JP |    | Y (D) |               |  | DE | highly<br>probable |
| 28 | Aggression<br>Intentional Self-<br>Injury<br>Mental Disorder<br>Nervousness                                                            | 69 | M |    | SK |    |       |               |  | HO | probable           |
| 29 | Anxiety                                                                                                                                | 75 | F |    | US |    |       |               |  |    | probable           |

## LORLATINIB

| Case | Psychiatric Event                                                                | age | sex | weight | country | time to onset | Stopped* | other drug-related risk factors | other disease-related risk factors | Outcome# | causality score |
|------|----------------------------------------------------------------------------------|-----|-----|--------|---------|---------------|----------|---------------------------------|------------------------------------|----------|-----------------|
| 1    | Hallucination, auditory<br>Hallucination, visual<br>Persecutory delusion         | 64  | F   |        | FR      | 13            | N        | prednisone                      |                                    | OT       | possible        |
| 2    | Aggression<br>Depression<br>Hallucination, auditory                              | 63  | F   | 66     | US      | 1             | Y (D)    |                                 |                                    | OT       | highly probable |
| 3    | Aggression<br>Anxiety<br>Hallucination                                           | 69  | M   | 82     | FR      |               | Y (D)    | prednisolone                    |                                    | HO       | possible        |
| 4    | Anger<br>Anxiety<br>Insomnia<br>Mood altered<br>Nightmare                        | 39  | F   | 59     | SG      |               | N        |                                 |                                    | OT       | probable        |
| 5    | Depression<br>Psychotic disorder                                                 | 38  | F   | 58     | ES      |               | Y (D)    | dexamethasone                   |                                    | DS       | unlikely        |
| 6    | Psychotic disorder                                                               | 38  | F   | 165    | ES      |               | Y (D)    |                                 |                                    | HO       | highly probable |
| 7    | Mood altered                                                                     | 57  | M   | 68     | MY      |               | Y (D)    |                                 |                                    | OT       | highly probable |
| 8    | Delusion<br>Feeling abnormal<br>Hallucination, auditory<br>Hallucination, visual | 72  | F   |        | JP      |               | Y (D)    |                                 |                                    | HO       | highly probable |

|    |                                                |    |   |    |    |     |         |  |  |    |                    |
|----|------------------------------------------------|----|---|----|----|-----|---------|--|--|----|--------------------|
| 9  | Depressed mood<br>Feeling abnormal             | 72 | F |    | US |     | N       |  |  | HO | probable           |
| 10 | Thinking abnormal                              |    | F |    | US |     | N       |  |  | HO | probable           |
| 11 | Hallucination<br>Psychotic disorder            | 45 | M | 85 | FR |     | Y       |  |  | DS | probable           |
| 12 | Aggression<br>Delirium                         | 70 | F |    | JP | 4   | N       |  |  | OT | probable           |
| 13 | Delirium<br>Hallucination<br>Suicidal ideation | 69 | M |    | JP |     | Y (D;R) |  |  | DE | highly<br>probable |
| 14 | Anger<br>Irritability                          |    | F |    | US |     | N       |  |  |    | probable           |
| 15 | Psychotic symptom                              | 39 | M | 62 | JP | 16  | Y (D)   |  |  | HO | highly<br>probable |
| 16 | Hallucination                                  | 62 | M | 64 | JP | 5   | Y (D)   |  |  | OT | highly<br>probable |
| 17 | Abnormal dreams<br>Nightmare                   |    | M |    | US |     | N       |  |  |    | probable           |
| 18 | Affective disorder                             | 44 | M | 80 | FR |     | Y (D)   |  |  | OT | highly<br>probable |
| 19 | Substance-induced psychotic disorder           | 23 | M | 72 | CA |     | Y (D)   |  |  | HO | highly<br>probable |
| 20 | Panic disorder                                 | 89 | F |    | JP | 2   | Y       |  |  | OT | probable           |
| 21 | Hallucination                                  | 80 | F | 69 | BE | 220 | Y (D)   |  |  | HO | highly<br>probable |
| 22 | Nervousness                                    | 65 | M | 73 | US |     | N       |  |  |    | probable           |
| 23 | Hallucination                                  |    |   |    | KW |     | Y       |  |  | OT | probable           |

|           |                                                                                                  |    |   |    |    |  |       |              |  |    |          |
|-----------|--------------------------------------------------------------------------------------------------|----|---|----|----|--|-------|--------------|--|----|----------|
| <b>24</b> | Depersonalisation/derealisation disorder<br>Feeling abnormal<br>Nightmare<br>Psychiatric symptom | 79 | F | 53 | JP |  | Y (D) | prednisolone |  | OT | possible |
| <b>25</b> | Anxiety<br>Panic attack                                                                          | 22 | M | 58 | IT |  | N     |              |  | OT | probable |
| <b>26</b> | Feeling of despair                                                                               | 53 | F | 62 | US |  | Y     |              |  | HO | probable |

\* (D) refers to a verified dechallenge; (R) to a verified rechallenge  
# DE = Death; DS = Disability; HO = Hospitalization; OT = Other serious
